# Supplementary material
Source: publisher figshare collection journal article supplement (https://acs.figshare.com/ndownloader/files/24020898)
Supplement: Supplementary file 1 [file 24020898]

## Sheet: Sheet1
Peptide	Modification	Accession	Protein name
ALEIFAY	Nitro@7	gi|544460151; gi|544460155; gi|544460153; gi|544460157	heat shock 70 kDa protein 12A
DFLPLYF	Nitro@6	gi|544500058	2',3'-cyclic-nucleotide 3'-phosphodiesterase
DHGVNSFLVY	Nitro@10	gi|544451029	dihydropyrimidinase-related protein 2
DLVILLY	Nitro@7	gi|544449539	heat shock protein HSP 90-alpha
DVFLGMFLY	Nitro@9	gi|544432802	serum albumin precursor
FDLMYAK	Nitro@5	gi|544469628; gi|544469630; gi|544469632	tubulin alpha-1B chain
FYAPELLFF	Nitro@2	gi|544432802	serum albumin precursor
GLLYSEVTASSLVK	Nitro@4	gi|544431020; gi|544431016	alpha-adducin
GMYGIENEVFL	Nitro@3	gi|544453836; gi|544422137; gi|544468690	L-lactate dehydrogenase B chain
GPAVGIDLGTTY	Nitro@12	gi|544490497; gi|544490495	heat shock cognate 71 kDa protein
ITFVDFLAYDVLDMR	Nitro@9	gi|544492141; gi|544403845; gi|544492135	glutathione S-transferase mu 5
LALTTAEFLAY	Nitro@11	gi|544450667	V-type proton ATPase subunit B, brain isoform
LDEDLAAY	Nitro@8	gi|544500058	2',3'-cyclic-nucleotide 3'-phosphodiesterase
LLDAVDTYIPVPTR	Nitro@8	gi|544516284	elongation factor Tu, mitochondrial
MTQIMFETFNTPAMY	Nitro@15	gi|544418876; gi|544502299	actin, cytoplasmic 2
MVSADAYK	Nitro@7	gi|544500058	2',3'-cyclic-nucleotide 3'-phosphodiesterase
QLVNATTEYAEF	Nitro@9	gi|544492244	dynamin-1
QYQVVLVEPK	Nitro@2	gi|544500058	2',3'-cyclic-nucleotide 3'-phosphodiesterase
RLDEDLAAY	Nitro@9	gi|544500058	2',3'-cyclic-nucleotide 3'-phosphodiesterase
VALTGLTVAEY	Nitro@11	gi|544470700	ATP synthase subunit beta, mitochondrial
VGIDFLNY	Nitro@8	gi|544460151; gi|544460155; gi|544460153; gi|544460157	heat shock 70 kDa protein 12A
YAEIVHL	Nitro@1	gi|544450667	V-type proton ATPase subunit B, brain isoform
YIAIVSTTVETK	Nitro@1	gi|544455714; gi|544455712	rab GDP dissociation inhibitor beta
YQVLLDGLVLQGLY	Nitro@14	gi|544463540	V-type proton ATPase subunit E 1
YVGEGMEEGEFSEAR	Nitro@1	gi|544469628; gi|544469630; gi|544469632	tubulin alpha-1B chain
